# Supplementary material for: Ankyrin-R regulates fast-spiking interneuron excitability through perineuronal nets and Kv3.1b K+ channels
Source: eLife. 2021 Jun 28;10:e66491. doi: 10.7554/eLife.66491 (PMC8257253; doi:10.7554/eLife.66491)
Supplement: Figure 1—source data 1. [file elife-66491-fig1-data1.xlsx]

## Sheet: Sheet1
	Fig.1B - AnkR Temporal Expression by Immunoblot in B6 Mice														Fig. 1C - AnkR co-localization with Parvalbumin (Pv) and Somatostatin (SST) in 3-month Cortex																	Fig. 1G - AnkR conditional knockout validation immunoblot
		Timepoint: P1	P1#1	P1#2	P1#3	P1#4	P1 Mean								Cortex
		AnkR	2324.28	1207.68	211.424	1002.25										AnkR+	AnkR+	AnkR+	AnkR+	AnkR-	AnkR-	AnkR-
		NFM	17061.7	17977.8	2395.43	13214.8										Pv+	Pv+	Pv-	Pv-	Pv+	Pv-	Pv+		Total	Total	Total
		AnkR norm to NFM	0.145525	0.111501	0.0875107	0.0819409	0.106619									SST+	SST-	SST+	SST-	SST-	SST+	SST+	Total Cells	AnkR+ Cells	Pv+ Cells	SST+ Cells
		AnkR norm to 6mo	0.14509	0.111167	0.087249	0.0816958	0.106301								Control#1 Cell#	0	160	18	29	11	70	0	288	207	171	88
															Control#2 Cell#	1	158	17	28	13	89	0	306	204	172	107
															Control#3 Cell#	0	184	15	24	17	89	0	329	223	201	104
		Timepoint: P15	P15#1	P15#2	P15#3	P15#4	P15 Mean								Mean	0.333333	167.333	16.6667	27	13.6667	82.6667	0	923
		AnkR	15703.5	13853.2	3807.94	2322.54
		NFM	45801	38149.9	13122.6	8521.74										Pv+	Total	% Pv with	% AnkR with	% AnkR with		SST+	Total	% SST with	% AnkR with	% AnkR with		% AnkR with	% AnkR
		AnkR norm to NFM	0.371574	0.419671	0.405694	0.292678	0.372404									AnkR+	Pv+ Cells	AnkR	Pv	Pv (SST-)		AnkR+	SST+ Cells	AnkR	SST	SST (Pv-)		Pv+ and SST+	Unknown
		AnkR norm to 6mo	0.370463	0.418416	0.404481	0.291802	0.371291									160	171	0.935673	0.772947	0.772947		18	88	0.204545	0.0869565	0.0869565		0	0.140097
																159	172	0.924419	0.779412	0.77451		18	107	0.168224	0.0882353	0.0833333		0.00490196	0.137255
																184	201	0.915423	0.825112	0.825112		15	104	0.144231	0.0672646	0.0672646		0	0.107623
		Timepoint: P30	P30#1	P30#2	P30#3	P30 Mean									Mean	167.667	181.333	0.925171	0.79249	0.790856		17	99.6667	0.172334	0.0808188	0.0791848		0.00163399	0.128325
		AnkR	18122.8	9423.13	4621.08										SEM	8.17177	9.83757	0.00585767	0.0164174	0.0171339		1	5.89727	0.0175322	0.00678716	0.0060512		0.00163399	0.0103833
		NFM	15812.2	11555.1	5671.37
		AnkR norm to NFM	1.17837	0.792965	0.811483	0.927608
		AnkR norm to 6mo	1.17485	0.790594	0.809056	0.924833									Fig. 1D - AnkR co-localization with Parvalbumin (Pv) and Somatostatin (SST) in 3-month Hippocampus
															Hippocampus	AnkR+	AnkR+	AnkR+	AnkR+	AnkR-	AnkR-	AnkR-
		Timepoint: 6-months	6mo#1	6mo#2	6mo#3	6mo Mean										Pv+	Pv+	Pv-	Pv-	Pv+	Pv-	Pv+		Total	Total	Total
		AnkR	17748.7	16035.2	11260.6											SST+	SST-	SST+	SST-	SST-	SST+	SST+	Total Cells	AnkR+ Cells	Pv+ Cells	SST+ Cells
		NFM	17455	19204.8	12008										Control#1 Cell#	2	44	19	16	2	14	0	97	81	48	35
		AnkR norm to NFM	1.00936	0.843753	1.1571	1.00341									Control#2 Cell#	2	60	26	16	3	23	0	130	104	65	51
		AnkR norm to 6mo	1.00634	0.84123	1.15364	1.00041									Control#3 Cell#	4	61	14	7	4	25	0	115	86	69	43
															Mean	2.66667	55	19.6667	13	3	20.6667	0	342
																Pv+	Total	% Pv with	% AnkR with	% AnkR with		SST+	Total	% SST with	% AnkR with	% AnkR with		% AnkR with	% AnkR
		Multiple unpaired t-tests with Welch correction and Holm-Šídák method for multiple comparisons														AnkR+	Pv+ Cells	AnkR	Pv	Pv (SST-)		AnkR+	SST+ Cells	AnkR	SST	SST (Pv-)		Pv+ and SST+	Unknown
		Test name	Unpaired t test with Welch correction													46	48	0.958333	0.567901	0.54321		21	35	0.6	0.259259	0.234568		0.0246914	0.197531
		Variance assumption	Individual variance for each group													62	65	0.953846	0.596154	0.576923		28	51	0.54902	0.269231	0.25		0.0192308	0.153846
		Multiple comparisons	Set P value threshold													65	69	0.942029	0.755814	0.709302		18	43	0.418605	0.209302	0.162791		0.0465116	0.0813953
		Method	Holm-Šídák method												Mean	57.6667	60.6667	0.951403	0.639956	0.609812		22.3333	43	0.522541	0.245931	0.215786		0.0301446	0.144257
		Alpha	0.05												SEM	5.89727	6.43774	0.00486262	0.0585001	0.0506883		2.96273	4.6188	0.054012	0.0185391	0.0268696		0.00833396	0.0338665
		Multiple t-tests	Below threshold?	P value	Mean of 1st group	Mean of 2nd group	Difference	SE of difference	t ratio	df	Adjusted P Value
		P1 vs. P15	Yes	0.000678	10.75	37	-26.25	3.25	8.07692	4.62072	0.000678
		P1 vs. P30	Yes	0.020774	10.75	92.3333	-81.5833	12.4435	6.55631	2.06302	0.020774
		P1 vs. 6mo	Yes	0.008414	10.75	100	-89.25	9.09556	9.81248	2.11982	0.008414
		P15 vs. P30	Yes	0.04032	37	92.33	-55.33	12.67	4.366	2.216	0.04032
		P15 vs. 6mo	Yes	0.013044	37	100	-63	9.407	6.697	2.411	0.013044
		P30 vs. 6mo	No	0.644105	92.3333	100	-7.66667	15.2571	0.5025	3.64975	0.644105
