# Supplementary material for: Ankyrin-R regulates fast-spiking interneuron excitability through perineuronal nets and Kv3.1b K+ channels
Source: eLife. 2021 Jun 28;10:e66491. doi: 10.7554/eLife.66491 (PMC8257253; doi:10.7554/eLife.66491)
Supplement: Figure 2—source data 1. [file elife-66491-fig2-data1.xlsx]

## Sheet: Sheet1
	Fig.2B - b1 spectrin and AnkR Immunoprecipitation											Fig.2C - b1 spectrin and AnkR Immunoblot 1-month													Fig.2D - Mass Spectrometry Candidate Table																				Fig.2J - Perisomatic and Axon Initial Segment (AIS) NrCAM staining intensity in Caudoputamen at 1-month
																					Unpaired t test																				Bin #	PSM
													Control - Ank1 flox/flox (A)								P value	0.000701				Category	Gene	Acc #	Protein MW	Protein Name	AnkR F/F (427n) PSM	AnkR F/F (420n) PSM	AnkR F/F (67n) PSM	AnkR IP Mean PSM	Bin #	KO PSM	WT PSM	WT-KO PSM	% Down Regulated		1	50+				Perisomatic	Area	Mean/Area	IntDen/Area
													Animal	1	2	3	4	5	6		P value summary	***				scaffolding	Ank1	A0A0R4J1N7	209520	Ankyrin-1	41	69	50	53	1	0	15	15	1		2	30-49				Flox#1	926.429	62.5482	66349.5
													Genotype	flox/flox	flox/flox	flox/flox	flox/flox	flox/flox	flox/flox		Significantly different (P < 0.05)?	Yes				cytoskeleton	Itsn1	Q9Z0R4	194299	Intersectin-1	9	12	23	15	4	1	7	6	0.857143		3	20-29				Flox#2	862.714	57.7727	65052
													bI Spectrin	6525.2	4565.1	2594.43	7893.66	6977.12	2088.28		One- or two-tailed P value?	Two-tailed				other - protein folding	Cct4	P80315	58066.9	T-complex protein 1 subunit delta	20	20	26	22	3	2	9	7	0.777778		4	10-19				Flox#3	856.857	53.9695	62069.2
													NFM	13313.3	14083.5	14075.7	7799.05	6630.39	4785.8		t, df	t=4.82087, df=10				cytoskeleton	Myh14	Q6URW6	228588	Myosin-14	109	127	119	118	1	5	16	11	0.6875							Flox Mean	882	58.0968	64490.2
													bI norm NFM	0.490125	0.324145	0.18432	1.01213	1.0523	0.436348							transport	Cse1l	Q9ERK4	110456	Exportin-2	32	18	27	26	3	2	6	4	0.666667		Candidate Filters					SEM	22.2785	2.48176	1267.14
													Norm to flox Avg	1.47245	0.973809	0.55374	1.21418	1.26236	0.523455		How big is the difference?					ECM	Tnc	Q80YX1	231809	Tenascin-C	17	20	18	18	4	2	6	4	0.666667		Mean IP PSM >10
																					Mean of column A	0.999833				mitochondria	Gad1	P48318	66648.9	Glutamate decarboxylase 1	16	16	19	17	4	2	6	4	0.666667		WT Hom. PSM >5					Nes-cKO#1	756	34.863	41873.7
													cKO - Ank1 flox/flox; Nestin-Cre (B)								Mean of column B	0.2125				other - ER	Fbxo2	Q3USR5	33676.2	F-box only protein 2	5	9	17	10	4	3	8	5	0.625		WT-KO PSM >2					Nes-cKO#2	906.429	42.7564	39697.4
													Animal	1	2	3	4	5	6		Difference between means (B - A) ± SEM	-0.787333 ± 0.163318				signaling	Usp9x	P70398	290714	Probable ubiquitin carboxyl-terminal hydrolase FAF-X	51	35	56	47	2	4	10	6	0.6		Down-Regulated >20%					Nes-cKO#3	874	39.8983	41023.9
													Genotype	Nes-cKO	Nes-cKO	Nes-cKO	Nes-cKO	Nes-cKO	Nes-cKO		95% confidence interval	-1.15123 to -0.423439				signaling	Ubr4	A2AN08	572295	E3 ubiquitin-protein ligase UBR4	48	37	50	45	2	2	5	3	0.6		72 Total Proteins					Nes-cKO Mean	845.476	39.1726	40865
													bI Spectrin	801.234	699.698	696.406	3059.35	1964.38	2032.03		R squared (eta squared)	0.699165				transport	Kif1a	Q6P5H4	190994	Kif1a protein	21	16	22	20	4	4	10	6	0.6							SEM	45.707	2.30735	633.235
													NFM	13250.8	8195.59	12193.2	44706	7329.41	9348.09							cytoskeleton	Wdr1	O88342	66407.3	WD repeat-containing protein 1	8	14	18	13	4	2	5	3	0.6
													bI norm NFM	0.0604668	0.0853749	0.0571141	0.0684326	0.268013	0.217374		F test to compare variances					other - stress	Stip1	Q3THQ5	62501.6	Stress-induced-phosphoprotein 1	16	16	26	19	4	3	7	4	0.571429		Sorted By:					AIS	Area	Mean/Area	IntDen/Area
													Norm to flox Avg	0.181657	0.256487	0.171584	0.0820937	0.321516	0.260768		F, DFn, Dfd	21.3293, 5, 5				transport	Kif2a	E0CZ72	83861.5	Kinesin-like protein	6	11	18	12	4	3	7	4	0.571429		% Down Regulated					Flox#1	115	318.746	83418.2
																					P value	0.004392				other - GEF	Sbf1	Q6ZPE2	208694	Myotubularin-related protein 5	24	21	33	26	3	4	9	5	0.555556		then Mean IP PSM					Flox#2	132.429	335.87	80087
													Flox Mean bI Spectrin	1							P value summary	**				signaling	Eif4a2	P10630	46402.7	Eukaryotic initiation factor 4A-II	16	14	19	16	4	4	9	5	0.555556							Flox#3	120.5	319.06	80739.3
													SEM	0.159671							Significantly different (P < 0.05)?	Yes				mitochondria	Gls	D3Z7P3	73964.4	Glutaminase kidney isoform, mitochondrial	52	36	46	45	2	5	11	6	0.545455							Flox Mean	122.643	324.559	81414.8
																										cytoskeleton	Myh11	Q69ZX3	228270	Myosin-11	57	61	77	65	1	5	10	5	0.5							SEM	5.14401	5.65643	1019.23
													cKO Mean bI Spectrin	0.212351							Data analyzed					synaptic	Cadps	Q80TJ1	153114	Calcium-dependent secretion activator 1	53	39	54	49	2	8	16	8	0.5
													SEM	0.0345351							Sample size, column A	6				mitochondria	Aldh6a1	Q9EQ20	57916.2	Methylmalonate-semialdehyde dehydrogenase [acylating], mitochondrial	24	17	23	21	3	3	6	3	0.5							Nes-cKO#1	113.286	306.303	79655.9
																					Sample size, column B	6				other - protein folding	Psmd1	Q3TXS7	105731	26S proteasome non-ATPase regulatory subunit 1	11	14	23	16	4	4	8	4	0.5							Nes-cKO#2	107.429	267.387	80637.9
																										mitochondria	Phyhipl	Q8BGT8	42341.3	Phytanoyl-CoA hydroxylase-interacting protein-like	16	13	13	14	4	5	10	5	0.5							Nes-cKO#3	88.5714	269.369	83606.8
																										membrane	Plxna4	Q80UG2	212562	Plexin-A4	12	8	17	12	4	3	6	3	0.5							Nes-cKO Mean	103.095	281.02	81300.2
																										other	Caskin1	Q6P9K8	150496	Caskin-1	9	9	14	11	4	5	10	5	0.5							SEM	7.45615	12.6545	1187.65
																										signaling	Gpm6a	P35802	31149.8	Neuronal membrane glycoprotein M6-a	12	12	12	12	4	9	17	8	0.470588
																										other - stress	Hspa4l	P48722	94382.9	Heat shock 70 kDa protein 4L	22	23	30	25	3	6	11	5	0.454545
																										cytoskeleton	Arpc2	Q9CVB6	34357.4	Actin-related protein 2/3 complex subunit 2	20	15	15	17	4	5	9	4	0.444444
																										other - lipid	Prdx6	O08709	24870.9	Peroxiredoxin-6	13	14	16	14	4	5	9	4	0.444444
																										synaptic	Wdr7	Q920I9	163452	WD repeat-containing protein 7	54	48	65	56	1	7	12	5	0.416667
																										membrane	Slc17a6	Q8BLE7	64561.1	Vesicular glutamate transporter 2	13	9	11	11	4	7	12	5	0.416667
																										synaptic	Dbn1	Q9QXS6	77287.5	Drebrin	90	86	89	88	1	6	10	4	0.4
																										membrane	Gna13	P27601	44055	Guanine nucleotide-binding protein subunit alpha-13	14	13	17	15	4	6	10	4	0.4
																										other - lipid	Fasn	P19096	272431	Fatty acid synthase	81	64	87	77	1	25	41	16	0.390244
																										signaling	Npepps	Q11011	103326	Puromycin-sensitive aminopeptidase	28	27	27	27	3	8	13	5	0.384615
																										transport	Dync1li1	Q3TWG5	56614.7	Dynein cytoplasmic 1 light intermediate chain 1	26	19	28	24	3	5	8	3	0.375
																										other - myelin	Bcas1	Q80YN3	67378.1	Breast carcinoma-amplified sequence 1 homolog	17	17	25	20	4	5	8	3	0.375
																										membrane	Nrcam	Q810U4	138523	Neuronal cell adhesion molecule	15	17	19	17	4	5	8	3	0.375
																										ECM	Vcan	Q62059	366790	Versican core protein	11	8	14	11	4	5	8	3	0.375
																										cytoskeleton	Clasp2	Q08EB5	142517	CLIP-associating protein 2	44	35	49	43	2	7	11	4	0.363636
																										cytoskeleton	Ckap5	A0A0R4J0K2	223521	Cytoskeleton-associated protein 5	32	20	32	28	3	7	11	4	0.363636
																										cytoskeleton	Cap1	Q3U0U5	51575.3	Adenylyl cyclase-associated protein	19	24	33	25	3	7	11	4	0.363636
																										mitochondria	Aldh2	P47738	56538	Aldehyde dehydrogenase, mitochondrial	15	20	18	18	4	7	11	4	0.363636
																										transport	Gdi2	Q61598	50537.6	Rab GDP dissociation inhibitor beta	29	36	38	34	2	9	14	5	0.357143
																										ECM	Bcan	Q61361	95815.8	Brevican core protein	12	15	23	17	4	9	14	5	0.357143
																										signaling	Uchl1	Q9R0P9	24838.5	Ubiquitin carboxyl-terminal hydrolase isozyme L1	10	14	16	13	4	6	9	3	0.333333
																										synaptic	Pclo	Q9QYX7	550839	Protein piccolo	29	51	134	71	1	9	13	4	0.307692
																										cytoskeleton	Actn4	A0A1L1SV25	107109	Alpha-actinin-4	59	64	65	63	1	7	10	3	0.3
																										other - stress	Hsph1	Q61699	96408.3	Heat shock protein 105 kDa	28	27	32	29	3	7	10	3	0.3
																										synaptic	Hnrnpk	P61979	50976.7	Heterogeneous nuclear ribonucleoprotein K	27	20	26	24	3	7	10	3	0.3
																										cytoskeleton	Rufy3	Q9D394	53007.5	Protein RUFY3	16	14	18	16	4	7	10	3	0.3
																										cytoskeleton	Capn2	O08529	79872.9	Calpain-2 catalytic subunit	10	7	14	10	4	7	10	3	0.3
																										signaling	Ncdn	Q9Z0E0	78896	Neurochondrin	61	43	48	51	1	12	17	5	0.294118
																										other	Usp5	P56399	95834.1	Ubiquitin carboxyl-terminal hydrolase 5	27	25	28	27	3	8	11	3	0.272727
																										other - stress	Rtn3	Q9ES97	103880	Reticulon-3	16	17	24	19	4	8	11	3	0.272727
																										signaling	Rap1b	Q52L50	20825	RAS related protein 1b	17	20	20	19	4	8	11	3	0.272727
																										synaptic	Calb2	Q08331	31372.9	Calretinin	14	13	17	15	4	8	11	3	0.272727
																										membrane	Gpr158	Q8C419	134427	Probable G-protein coupled receptor 158	9	9	15	11	4	8	11	3	0.272727
																										membrane	Atp5c1	Q3UD06	32886.2	ATP synthase subunit gamma	15	12	17	15	4	11	15	4	0.266667
																										signaling	Pkm	P52480	57845.4	Pyruvate kinase PKM	41	39	51	44	2	28	38	10	0.263158
																										cytoskeleton	Tln2	B2RY15	271648	Tln2 protein	24	15	28	22	3	14	19	5	0.263158
																										synaptic	Synj1	E9Q7S0	144596	Synaptojanin-1	50	44	58	51	1	15	20	5	0.25
																										ECM	Tnr	Q8BYI9	149591	Tenascin-R	39	30	47	39	2	24	32	8	0.25
																										cytoskeleton	Septin8	B1AQZ0	55874.9	Septin-8	25	22	37	28	3	15	20	5	0.25
																										synaptic	Sv2a	Q9JIS5	82648	Synaptic vesicle glycoprotein 2A	26	24	29	26	3	9	12	3	0.25
																										signaling	Rap1gds1	E9Q6Q4	60793.1	RAP1, GTP-GDP dissociation stimulator 1	23	25	24	24	3	9	12	3	0.25
																										membrane	Slc25a12	Q8BH59	74570.2	Calcium-binding mitochondrial carrier protein Aralar1	48	40	48	45	2	26	34	8	0.235294
																										other - stress	Hspa9	P38647	73461.9	Stress-70 protein, mitochondrial	45	37	37	40	2	13	17	4	0.235294
																										membrane	Lsamp	Q3TYE5	37310.7	Limbic system-associated membrane protein	18	21	32	24	3	10	13	3	0.230769
																										transport	Ap1b1	O35643	103936	AP-1 complex subunit beta-1	42	46	50	46	2	17	22	5	0.227273
																										cytoskeleton	Septin11	Q8C1B7	49695.1	Septin-11	18	18	31	22	3	14	18	4	0.222222
																										cytoskeleton	Ppp2r1a	Q76MZ3	65323.2	Serine/threonine-protein phosphatase 2A 65 kDa regulatory subunit A alpha isoform	39	38	38	38	2	15	19	4	0.210526
																										other - stress	Hsp90aa1	P07901	84788.6	Heat shock protein HSP 90-alpha	84	72	74	77	1	16	20	4	0.2
[truncated: 6 more columns]
