# Supplementary material for: Ankyrin-R regulates fast-spiking interneuron excitability through perineuronal nets and Kv3.1b K+ channels
Source: eLife. 2021 Jun 28;10:e66491. doi: 10.7554/eLife.66491 (PMC8257253; doi:10.7554/eLife.66491)
Supplement: Figure 3—figure supplement 2—source data 1. [file elife-66491-fig3-figsupp2-data1.xlsx]

## Sheet: Sheet1
	Figure 3 -Supplement 2A - 1mo WFA Intensity Quantification														Figure 3 -Supplement 2B - 12mo WFA Intensity Quantification
		1-month WFA Intensity Quantification														12-months WFA Intensity Quantification
		group	animal	region	subregion	area (AU)	CTCF	n								control	136/40d	cortex	MOp	0.0041	13792.3	50
		control	100	cortex	RSP	0.0067	31524.8	30								control	129/36d	cortex	MOp	0.00526087	18340.9	50
		control	151	cortex	RSP	0.00606667	32394.6	30								control	170/41d	cortex	MOp	0.00442	12490.3	50
		control	174	cortex	RSP	0.0057	29490	30								cre	101	cortex	MOp	0.0036594	18144.6	50
		cre	121	cortex	RSP	0.0057	29610.2	30								cre	102	cortex	MOp	0.0037476	15231.2	50
		cre	145	cortex	RSP	0.00813333	29869.5	30								cre	104	cortex	MOp	0.00393	13880.9	50
		cre	194	cortex	RSP	0.00996429	32514.1	30								cKO	113/38d	cortex	MOp	0.00406	5246.43	50
		cko	192	cortex	RSP	0.00536667	21388.9	30								cKO	149/35d	cortex	MOp	0.00358	9299.74	50
		cko	156	cortex	RSP	0.0049	16874	30								cKO	199/34d	cortex	MOp	0.00442	9496.36	50
		cko	135	cortex	RSP	0.00666667	22650.9	30								control	Mean	cortex	MOp	0.00459362	14874.5	150
		control	Mean	cortex	RSP	0.00615556	31136.5	90								cre	Mean	cortex	MOp	0.003779	15752.2	150
		cre	Mean	cortex	RSP	0.00793254	30664.6	90								cko	Mean	cortex	MOp	0.00402	8014.18	150
		cko	Mean	cortex	RSP	0.00564444	20304.6	90								control	SEM	cortex	MOp	0.000346176	1773.49
		control	SEM	cortex	RSP	0.000292076	860.665									cre	SEM	cortex	MOp	7.96776e-05	1258.08
		cre	SEM	cortex	RSP	0.00123508	927.754									cko	SEM	cortex	MOp	0.000243311	1385.04
		cko	SEM	cortex	RSP	0.000528567	1753.56
																control	136/40d	cortex	MOs	0.0043	28778.6	40
		control	100	cortex	MOs	0.005275	30366.6	40								control	129/36d	cortex	MOs	0.0065641	26909.8	40
		control	151	cortex	MOs	0.005825	30930	40								control	170/41d	cortex	MOs	0.004875	25551.8	40
		control	174	cortex	MOs	0.00635	21066.9	40								cre	101	cortex	MOs	0.003872	28924.5	40
		cre	121	cortex	MOs	0.009425	32681.7	40								cre	102	cortex	MOs	0.00503475	27942.3	40
		cre	145	cortex	MOs	0.00745	20649.2	40								cre	104	cortex	MOs	0.0049055	25321.6	40
		cre	194	cortex	MOs	0.006575	22342.7	40								cKO	113/38d	cortex	MOs	0.00520513	15905.5	40
		cko	192	cortex	MOs	0.004925	17948.2	40								cKO	149/35d	cortex	MOs	0.003825	17230.4	40
		cko	156	cortex	MOs	0.005175	16859.6	40								cKO	199/34d	cortex	MOs	0.00445	14606.8	40
		cko	135	cortex	MOs	0.00535	16219.3	40								control	Mean	cortex	MOs	0.00524637	27080.1	120
		control	Mean	cortex	MOs	0.00581667	27454.5	120								cre	Mean	cortex	MOs	0.00460408	27396.2	120
		cre	Mean	cortex	MOs	0.00781667	25224.5	120								cko	Mean	cortex	MOs	0.00449338	15914.2	120
		cko	Mean	cortex	MOs	0.00515	17009	120								control	SEM	cortex	MOs	0.000679455	935.391
		control	SEM	cortex	MOs	0.000310354	3197.95									cre	SEM	cortex	MOs	0.000367938	1075.32
		cre	SEM	cortex	MOs	0.000842903	3760.5									cko	SEM	cortex	MOs	0.000398999	757.375
		cko	SEM	cortex	MOs	0.000123322	504.662
																control	136/40d	cortex	RSP	0.00513333	43400.7	30
		control	100	cortex	MOp	0.00392	12975.8	50								control	129/36d	cortex	RSP	0.00606667	49511.2	30
		control	151	cortex	MOp	0.00458	14114.9	50								control	170/41d	cortex	RSP	0.00533333	35381.2	30
		control	174	cortex	MOp	0.0062	15423.4	50								cre	101	cortex	RSP	0.005292	43433.4	30
		cre	121	cortex	MOp	0.0044	12658.1	50								cre	102	cortex	RSP	0.00552233	47661.2	30
		cre	145	cortex	MOp	0.00652	17481.6	50								cre	104	cortex	RSP	0.00554567	39011	30
		cre	194	cortex	MOp	0.005	16954.4	50								cKO	113/38d	cortex	RSP	0.0069	20940.5	30
		cko	192	cortex	MOp	0.00424	13235.9	50								cKO	149/35d	cortex	RSP	0.00466667	27763.3	30
		cko	156	cortex	MOp	0.00456	13646.6	50								cKO	199/34d	cortex	RSP	0.00413333	15749.4	30
		cko	135	cortex	MOp	0.00452	8834.66	50								control	Mean	cortex	RSP	0.00551111	42764.4	90
		control	Mean	cortex	MOp	0.0049	14171.4	150								cre	Mean	cortex	RSP	0.00545333	43368.5	90
		cre	Mean	cortex	MOp	0.00530667	15698	150								cko	Mean	cortex	RSP	0.00523333	21484.4	90
		cko	Mean	cortex	MOp	0.00444	11905.7	150								control	SEM	cortex	RSP	0.000283714	4091.35
		control	SEM	cortex	MOp	0.000677348	707.11									cre	SEM	cortex	RSP	8.09474e-05	2497.3
		cre	SEM	cortex	MOp	0.000630908	1527.58									cko	SEM	cortex	RSP	0.000847436	3478.76
		cko	SEM	cortex	MOp	0.000100664	1540.11
		control	100	cortex	SSp	0.0051	35917.4	50								control	136/40d	cortex	SSp	0.0042	25219.6	50
		control	151	cortex	SSp	0.00562	37933.1	50								control	129/36d	cortex	SSp	0.00468	24685	50
		control	174	cortex	SSp	0.00732	34044.8	50								control	170/41d	cortex	SSp	0.00578	25441.7	50
		cre	121	cortex	SSp	0.00574	34486	50								cre	101	cortex	SSp	0.00445575	30394.6	50
		cre	145	cortex	SSp	0.00682	33317.4	50								cre	102	cortex	SSp	0.0036432	27367.6	50
		cre	194	cortex	SSp	0.00574	36036.9	50								cre	104	cortex	SSp	0.003533	25209.3	50
		cko	192	cortex	SSp	0.00514	28184.9	50								cKO	113/38d	cortex	SSp	0.00466	10047.6	50
		cko	156	cortex	SSp	0.00486	28829.8	50								cKO	149/35d	cortex	SSp	0.00688	20385.6	50
		cko	135	cortex	SSp	0.0058	21271.8	50								cKO	199/34d	cortex	SSp	0.0051	16104.7	50
		control	Mean	cortex	SSp	0.00601333	35965.1	150								control	Mean	cortex	SSp	0.00488667	25115.4	150
		cre	Mean	cortex	SSp	0.0061	34613.4	150								cre	Mean	cortex	SSp	0.00387732	27657.2	150
		cko	Mean	cortex	SSp	0.00526667	26095.5	150								cko	Mean	cortex	SSp	0.00554667	15512.7	150
		control	SEM	cortex	SSp	0.000670356	1122.69									control	SEM	cortex	SSp	0.000467666	224.579
		cre	SEM	cortex	SSp	0.00036	787.624									cre	SEM	cortex	SSp	0.000290962	1503.86
		cko	SEM	cortex	SSp	0.000278648	2419.03									cko	SEM	cortex	SSp	0.000678659	2998.97
		control	100	cortex	SSs	0.0054	37907	30
		control	151	cortex	SSs	0.00556667	28511.1	30								control	136/40d	cortex	SSs	0.00446667	23443.4	30
		control	174	cortex	SSs	0.00826667	37084.4	30								control	129/36d	cortex	SSs	0.00603333	36965.8	30
		cre	121	cortex	SSs	0.006	36331.5	30								control	170/41d	cortex	SSs	0.00554851	38981.1	30
		cre	145	cortex	SSs	0.00766667	36188.6	30								cre	101	cortex	SSs	0.00476267	36586.8	30
		cre	194	cortex	SSs	0.00533333	33464.4	30								cre	102	cortex	SSs	0.004652	38008.8	30
		cko	192	cortex	SSs	0.00543333	28193.2	30								cre	104	cortex	SSs	0.00547167	40150.2	30
		cko	156	cortex	SSs	0.0046	28652.8	30								cKO	113/38d	cortex	SSs	0.00457625	13580.1	30
		cko	135	cortex	SSs	0.00623333	20672.9	30								cKO	149/35d	cortex	SSs	0.00513333	18383	30
		control	Mean	cortex	SSs	0.00641111	34500.8	90								cKO	199/34d	cortex	SSs	0.00576667	16782.4	30
		cre	Mean	cortex	SSs	0.00633333	35328.2	90								control	Mean	cortex	SSs	0.0053495	33130.1	90
		cko	Mean	cortex	SSs	0.00542222	25839.6	90								cre	Mean	cortex	SSs	0.00496211	38248.6	90
		control	SEM	cortex	SSs	0.000929024	3004.27									cko	Mean	cortex	SSs	0.00515875	16248.5	90
		cre	SEM	cortex	SSs	0.000693889	932.803									control	SEM	cortex	SSs	0.000463075	4878.18
		cko	SEM	cortex	SSs	0.000471535	2586.76									cre	SEM	cortex	SSs	0.000256773	1035.63
																cko	SEM	cortex	SSs	0.000343879	1411.95
	Multiple unpaired t-tests with Holm-Šídák method for multiple comparisons														Multiple unpaired t-tests with Holm-Šídák method for multiple comparisons
		Test name	Unpaired t test													Test name	Unpaired t test
		Variance assumption	Individual variance for each row													Variance assumption	Individual variance for each row
		Multiple comparisons	Set P value threshold													Multiple comparisons	Set P value threshold
		Method	Holm-Šídák method													Method	Holm-Šídák method
		Alpha	0.05													Alpha	0.05
		Ank1F/F v. Ank1+/+;Dlx5/6-Cre														Ank1F/F v. Ank1+/+;Dlx5/6-Cre
		Region	Below threshold?	P value	Mean of Ank1F/F	Mean of Ank1+/+;Dlx5/6+	Difference	SE of difference	t ratio	df	Adjusted P Value					Region	Below threshold?	P value	Mean of Ank1F/F	Mean of Ank1+/+;Dlx5/6+	Difference	SE of difference	t ratio	df	Adjusted P Value
		RSP	No	0.728099	31137	30665	472	1266	0.373	4	0.965631					RSP	No	0.905804	42764	43368	-604	4793	0.126	4	0.974858
		MOs	No	0.67487	27455	25225	2230	4937	0.4517	4	0.965631					MOs	No	0.835393	27080	27396	-316	1425	0.2217	4	0.974858
		MOp	No	0.415723	14171	15698	-1527	1683	0.907	4	0.908489					MOp	No	0.707046	14874	15752	-878	2175	0.4038	4	0.974858
		SSp	No	0.380139	35965	34613	1352	1371	0.9856	4	0.908489					SSp	No	0.169972	25116	27657	-2542	1521	1.671	4	0.525354
		SSs	No	0.805469	34501	35328	-827.7	3146	0.2631	4	0.965631					SSs	No	0.135498	30665	38249	-7584	4065	1.866	4	0.517131
		Ank1F/F v. Ank1F/F;Dlx5/6-Cre														Ank1F/F v. Ank1F/F;Dlx5/6-Cre
		Region	Below threshold?	P value	Mean of Ank1F/F	Mean of Ank1F/F;Dlx5/6+	Difference	SE of difference	t ratio	df	Adjusted P Value					Region	Below threshold?	P value	Mean of Ank1F/F	Mean of Ank1F/F;Dlx5/6+	Difference	SE of difference	t ratio	df	Adjusted P Value
		RSP	Yes	0.005174	31137	20305	10832	1953	5.545	4	0.025602					RSP	No	0.016643	42764	21484	21280	5370	3.963	4	0.064927
		MOs	No	0.032084	27455	17009	10446	3238	3.226	4	0.093198					MOs	Yes	0.000751	27080	15914	11166	1203	9.278	4	0.003747
		MOp	No	0.252251	14171	11906	2265	1695	1.337	4	0.252251					MOp	No	0.038085	14874	8014	6860	2250	3.048	4	0.076035
		SSp	No	0.020821	35965	26096	9869	2667	3.701	4	0.080719					SSp	No	0.03312	25116	15513	9603	3007	3.193	4	0.076035
		SSs	No	0.094251	34501	25840	8661	3964	2.185	4	0.179618					SSs	No	0.026016	30665	16248	14416	4177	3.452	4	0.076035
		Ank1+/+;Dlx5/6-Cre v. Ank1F/F;Dlx5/6-Cre														Ank1+/+;Dlx5/6-Cre v. Ank1F/F;Dlx5/6-Cre
		Region	Below threshold?	P value	Mean of Ank1F/F;Dlx5/6+	Mean of Ank1+/+;Dlx5/6+	Difference	SE of difference	t ratio	df	Adjusted P Value					Region	Below threshold?	P value	Mean of Ank1F/F;Dlx5/6+	Mean of Ank1+/+;Dlx5/6+	Difference	SE of difference	t ratio	df	Adjusted P Value
		RSP	Yes	0.006418	20305	30665	-10360	1984	5.222	4	0.031681					RSP	Yes	0.006932	21484	43368	-21884	4282	5.11	4	0.020653
		MOs	No	0.09632	17009	25225	-8216	3794	2.165	4	0.183362					MOs	Yes	0.000948	15914	27396	-11482	1315	8.731	4	0.003787
		MOp	No	0.15536	11906	15698	-3792	2169	1.748	4	0.183362					MOp	Yes	0.014432	8014	15752	-7738	1871	4.135	4	0.028655
		SSp	No	0.02862	26096	34613	-8518	2544	3.348	4	0.100165					SSp	Yes	0.022361	15513	27657	-12144	3355	3.62	4	0.028655
		SSs	No	0.026041	25840	35328	-9489	2750	3.451	4	0.100165					SSs	Yes	0.000231	16248	38249	-22000	1751	12.56	4	0.001154
