# Supplementary material for: Ankyrin-R regulates fast-spiking interneuron excitability through perineuronal nets and Kv3.1b K+ channels
Source: eLife. 2021 Jun 28;10:e66491. doi: 10.7554/eLife.66491 (PMC8257253; doi:10.7554/eLife.66491)
Supplement: Figure 3—source data 1. [file elife-66491-fig3-data1.xlsx]

## Sheet: Sheet1
	Fig. 3B - 1-month WFA and Pv Cell Numbers																			Fig. 3C - 1-month WFA Intensity Quantification																					Fig.3D - 1-month PNN 100X distuption via WFA 'hole' grading
		group	animal	region	area	Pv+	WFA+	Pv+/UA	WFA+/UA	WFA+/Pv+	WFA-/Pv+	WFA+/Pv-	C.Total	Cells/UA	WFA+/Pv+ /UA	WFA-/Pv+ /UA	WFA+/Pv- /UA				group	animal	region	subregion	area (AU)	CTCF	n (cells)		Multiple unpaired t-tests with Holm-Šídák method for multiple comparisons													Grading	control 1	control 2	control 3	dcKO 1	dcKO 2	dcKO 3
		flox	105d/174	hippocampus	50.672	73	56	13.4788	11.0515	19	62	33	110	2.17082	0.374961	1.22356	0.651247				control	100	hippocampus	CA1/CA3	0.00703333	27196	30		Test name	Unpaired t test												0	14	16	15	11	8	9
		flox	13n/100	hippocampus	38.968	65	58	16.7573	21.1199	22	44	40	101	2.59187	0.564566	1.12913	1.02648				control	151	hippocampus	CA1/CA3	0.0081	26398.3	30		Variance assumption	Individual variance for each row												1	5	3	4	7	9	9
		flox	98d/151	hippocampus	40.45	52	69	19.5303	19.9258	24	30	45	97	2.39802	0.593325	0.741656	1.11248				control	174	hippocampus	CA1/CA3	0.0118667	28278.8	30		Multiple comparisons	Set P value threshold												2	1	1	1	2	3	2
		cre	102d/145	hippocampus	36.257	75	68	21.4579	20.796	20	47	46	123	3.39245	0.551618	1.2963	1.26872				cre	121	hippocampus	CA1/CA3	0.0065	23144.8	30		Method	Holm-Šídák method												Total	20	20	20	20	20	20
		cre	93d/194	hippocampus	38.51	61	69	12.2825	17.1384	24	40	45	106	2.75253	0.623215	1.03869	1.16853				cre	145	hippocampus	CA1/CA3	0.00963333	25194.1	30		Alpha	0.05
		cre	94d/190	hippocampus	29.892	48	63	15.6229	25.6925	23	28	40	88	2.94393	0.769437	0.936705	1.33815				cre	194	hippocampus	CA1/CA3	0.00863333	29148.6	30															1-month	control 1	control 2	control 3	dcKO 1	dcKO 2	dcKO 3
		cko	103d/135	hippocampus	47.119	74	66	14.5377	12.8186	29	44	36	111	2.35574	0.615463	0.933806	0.764023				cko	192	hippocampus	CA1/CA3	0.0071	19075.2	30		Ank1F/F v. Ank1+/+;Dlx5/6-Cre													0	0.7	0.8	0.75	0.55	0.4	0.45
		cko	92d/156	hippocampus	33.694	57	67	19.3209	22.3482	27	32	39	97	2.87885	0.80133	0.949724	1.15748				cko	156	hippocampus	CA1/CA3	0.00723333	18836.4	30		Region	Below threshold?	P value	Mean of Ank1F/F	Mean of Ank1+/+;Dlx5/6+	Difference	SE of difference	t ratio	df	Adjusted P Value				1	0.25	0.15	0.2	0.35	0.45	0.45
		cko	94d/192	hippocampus	36.94	50.3867	62.1318	17.9751	20.0866	24	32	47	88.5184	2.39628	0.649702	0.86627	1.27233				cko	135	hippocampus	CA1/CA3	0.0081	19659.1	30		Hippocampus	No	0.472439	27291	25829	1462	1844	0.7925	4	0.72168				2	0.05	0.05	0.05	0.1	0.15	0.1
		flox	mean	hippocampus	43.3633	63.3333	61	16.5888	17.3657	21.6667	45.3333	39.3333	102.667	2.38691	0.51095	1.03145	0.930072				control	Mean	hippocampus	CA1/CA3	0.009	27291.1	90		Cortex	No	0.700813	28646	28305	340.3	824.1	0.413	4	0.72168				Total	1	1	1	1	1	1
		cre	mean	hippocampus	34.8863	61.3333	66.6667	16.4545	21.209	22.3333	38.3333	43.6667	105.667	3.02964	0.64809	1.09057	1.25847				cre	Mean	hippocampus	CA1/CA3	0.00825556	25829.2	90
		cko	mean	hippocampus	39.251	60.4622	65.0439	17.2779	18.4178	26.6667	36	40.6667	98.8395	2.54362	0.688832	0.9166	1.06461				cko	Mean	hippocampus	CA1/CA3	0.00747778	19190.3	90		Ank1F/F v. Ank1F/F;Dlx5/6-Cre													1-month	control Mean	dcKO Mean		Statistics:
		flox	105d/174	cortex	104.472	602	508	5.76231	4.86255	320	282	188	790	7.56183	3.06302	2.69929	1.79953				control	100	cortex	cortex	0.005279	29738.3	200		Region	Below threshold?	P value	Mean of Ank1F/F	Mean of Ank1F/F;Dlx5/6+	Difference	SE of difference	t ratio	df	Adjusted P Value				0	0.75	0.466667		2 tailed, type 2 Control v. cKO
		flox	13n/100	cortex	104.574	587	761	5.61325	7.27714	368	219	393	980	9.37135	3.51904	2.09421	3.7581				control	151	cortex	cortex	0.00553167	28776.7	200		Hippocampus	Yes	0.000171	27291	19190	8101	597.4	13.56	4	0.000342				1	0.2	0.416667		T.Test for 0	0.00578456
		flox	98d/151	cortex	115.874	736	737	6.35173	6.36036	400	336	337	1073	9.26006	3.45203	2.8997	2.90833				control	174	cortex	cortex	0.00676733	27421.9	200		Cortex	Yes	0.003403	28646	20231	8415	1353	6.219	4	0.003403				2	0.05	0.116667		T.Test for 1	0.0079662
		cre	102d/145	cortex	133.006	711	688	5.34562	5.1727	381	330	307	1018	7.65379	2.86453	2.48109	2.30817				cre	121	cortex	cortex	0.006253	29153.5	200															Total	1	1		T.Test for 2	0.0161301
		cre	93d/194	cortex	98.819	409	591	4.13888	5.98063	209	200	382	791	8.00453	2.11498	2.0239	3.86565				cre	145	cortex	cortex	0.007318	27501.3	200		Ank1+/+;Dlx5/6-Cre v. Ank1F/F;Dlx5/6-Cre
		cre	94d/190	cortex	105.238	416	705	3.95294	6.6991	253	163	452	868	8.24797	2.40407	1.54887	4.29503				cre	194	cortex	cortex	0.00652252	28262.5	200		Region	Below threshold?	P value	Mean of Ank1F/F;Dlx5/6+	Mean of Ank1+/+;Dlx5/6+	Difference	SE of difference	t ratio	df	Adjusted P Value
		cko	103d/135	cortex	113.227	612	539	5.40507	4.76035	311	301	228	840	7.41873	2.74669	2.65838	2.01365				cko	192	cortex	cortex	0.005021	21790.2	200		Hippocampus	Yes	0.020259	19190	25829	-6639	1779	3.732	4	0.020259
		cko	92d/156	cortex	93.725	592	687	6.31635	7.32995	349	243	338	930	9.92265	3.72366	2.59269	3.6063				cko	156	cortex	cortex	0.004819	20972.6	200		Cortex	Yes	0.003116	20231	28305	-8074	1268	6.369	4	0.006223			Fig.3J - 12-month PNN 100X distuption via WFA 'hole' grading
		cko	94d/192	cortex	117.12	608	671	5.19126	5.72917	339	269	332	940	8.02596	2.89447	2.29679	2.8347				cko	135	cortex	cortex	0.005714	17929.9	200															Grading	control 1	control 2	control 3	dcKO 1	dcKO 2	dcKO 3
		flox	mean	cortex	108.307	641.667	668.667	5.9091	6.16668	362.667	279	306	947.667	8.73108	3.3447	2.5644	2.82199				control	Mean	cortex	cortex	0.00585933	28645.6	600					CTFC										0	13	16	15	4	7	6
		cre	mean	cortex	112.354	512	661.333	4.47915	5.95081	281	231	380.333	892.333	7.96876	2.46119	2.01795	3.48962				cre	Mean	cortex	cortex	0.00669784	28305.7	600		hippocampus	F.Test	control v. cre	0.174586										1	6	4	4	11	8	10
		cko	mean	cortex	108.024	604	632.333	5.63756	5.93982	333	271	299.333	903.333	8.45578	3.12161	2.51595	2.81822				cko	Mean	cortex	cortex	0.00518467	20230.9	600		hippocampus	F.Test	control v. cko	0.334857										2	1	0	1	5	5	4
																													hippocampus	F.Test	cre v. cko	0.0377409										Total	20	20	20	20	20	20
																													cortex	F.Test	control v. cre	0.671057
			Multiple unpaired t-tests with Holm-Šídák method for multiple comparisons									WFA+/Pv+ /UA	WFA-/Pv+ /UA	WFA+/Pv- /UA							Corrected Total Cell Fluorescence (CTCF) =								cortex	F.Test	control v. cko	0.493165										12-month	control 1	control 2	control 3	dcKO 1	dcKO 2	dcKO 3
			Test name	Unpaired t test					hippocampus	F.Test	control v. cre	0.933665	0.689955	0.215692							raw integrated density - (area * mean fluorescence of background)								cortex	F.Test	cre v. cko	0.283652										0	0.65	0.8	0.75	0.2	0.35	0.3
			Variance assumption	Individual variance for each row					hippocampus	F.Test	control v. cko	0.820139	0.0584489	0.916883																												1	0.3	0.2	0.2	0.55	0.4	0.5
			Multiple comparisons	Set P value threshold					hippocampus	F.Test	cre v. cko	0.885102	0.108139	0.185661																												2	0.05	0	0.05	0.25	0.25	0.2
			Method	Holm-Šídák method					cortex	F.Test	control v. cre	0.595754	0.894602	0.937617																												Total	1	1	1	1	1	1
			Alpha	0.05					cortex	F.Test	control v. cko	0.358811	0.348462	0.793443						Fig. 3I - 12-month WFA Intensity Quantification
									cortex	F.Test	cre v. cko	0.680153	0.291703	0.734482							group	animal	region	subregion	area (AU)	CTCF	n (cells)		Multiple unpaired t-tests with Holm-Šídák method for multiple comparisons													12-month	control Mean	dcKO Mean		Statistics:
																					control	136/40d	hippocampus	CA1/CA3	0.00696667	30372.6	30		Test name	Unpaired t test												0	0.733333	0.283333		2 tailed, type 2 Control v. cKO
			Ank1F/F v. Ank1+/+;Dlx5/6-Cre																		control	129/36d	hippocampus	CA1/CA3	0.0071	31105.7	30		Variance assumption	Individual variance for each row												1	0.233333	0.483333		T.Test 0	0.00195569
			Region	Cell type	Below threshold?	P value	Mean of 1mo flox	Mean of 1mo cre control	Difference	SE of difference	t ratio	df	Adjusted P Value								control	170/41d	hippocampus	CA1/CA3	0.00756667	25869.6	30		Multiple comparisons	Set P value threshold												2	0.0333333	0.233333		T.Test 1	0.0106366
			Hippocampus	WFA+ Pv+	No	0.213129	0.5067	0.6467	-0.14	0.09463	1.479	4	0.380834								cre	101	hippocampus	CA1/CA3	0.006381	31442.7	30		Method	Holm-Šídák method												Total	1	1		T.Test 2	0.00105756
			Hippocampus	WFA- Pv+	No	0.74571	1.03	1.093	-0.06333	0.1822	0.3475	4	0.74571								cre	102	hippocampus	CA1/CA3	0.00473909	35934.3	30		Alpha	0.05
			Hippocampus	WFA+ Pv-	No	0.092989	0.93	1.26	-0.33	0.1502	2.197	4	0.253831								cre	104	hippocampus	CA1/CA3	0.00473909	34150.6	30
			Cortex	WFA+ Pv+	No	0.02737	3.343	2.457	0.8867	0.2611	3.396	4	0.079882								cKO	113/38d	hippocampus	CA1/CA3	0.0163667	16520.9	30		Ank1F/F v. Ank1+/+;Dlx5/6-Cre
			Cortex	WFA- Pv+	No	0.206054	2.563	2.017	0.5467	0.3625	1.508	4	0.36965								cKO	149/35d	hippocampus	CA1/CA3	0.00923333	19969.4	30		Region	Below threshold?	P value	Mean of Ank1F/F	Mean of Ank1+/+;Dlx5/6+	Difference	SE of difference	t ratio	df	Adjusted P Value
			Cortex	WFA+ Pv-	No	0.464372	2.823	3.493	-0.67	0.8291	0.8081	4	0.464372								cKO	199/34d	hippocampus	CA1/CA3	0.00753333	14992.9	30		Hippocampus	No	0.086939	29116	33843	-4726	2094	2.257	4	0.16632
																					control	Mean	hippocampus	CA1/CA3	0.00721111	29116	90		Cortex	No	0.264334	28100	30485	-2385	1838	1.297	4	0.264334
																					cre	Mean	hippocampus	CA1/CA3	0.00528639	33842.5	90
			Ank1F/F v. Ank1F/F;Dlx5/6-Cre																		cko	Mean	hippocampus	CA1/CA3	0.0110444	17161.1	90		Ank1F/F v. Ank1F/F;Dlx5/6-Cre
			Region	Cell type	Below threshold?	P value	Mean of 1mo flox	Mean of 1mo cKO	Difference	SE of difference	t ratio	df	Adjusted P Value								control	136/40d	cortex	cortex	0.00444	26926.9	200		Region	Below threshold?	P value	Mean of Ank1F/F	Mean of Ank1F/F;Dlx5/6+	Difference	SE of difference	t ratio	df	Adjusted P Value
			Hippocampus	WFA+ Pv+	No	0.107236	0.5067	0.69	-0.1833	0.08857	2.07	4	0.288442								control	129/36d	cortex	cortex	0.00572099	31282.5	200		Hippocampus	Yes	0.005575	29116	17161	11955	2201	5.431	4	0.010543
			Hippocampus	WFA- Pv+	No	0.489951	1.03	0.9167	0.1133	0.1493	0.7593	4	0.73985								control	170/41d	cortex	cortex	0.00519137	26090.1	200		Cortex	Yes	0.005286	28100	15435	12665	2298	5.512	4	0.010543
			Hippocampus	WFA+ Pv-	No	0.560171	0.93	1.063	-0.1333	0.2101	0.6346	4	0.73985								cre	101	cortex	cortex	0.00440836	31496.8	200
			Cortex	WFA+ Pv+	No	0.541275	3.343	3.12	0.2233	0.3348	0.667	4	0.903471								cre	102	cortex	cortex	0.00451998	31242.2	200		Ank1+/+;Dlx5/6-Cre v. Ank1F/F;Dlx5/6-Cre
			Cortex	WFA- Pv+	No	0.869921	2.563	2.517	0.04667	0.2674	0.1745	4	0.98308								cre	104	cortex	cortex	0.00467717	28714.6	200		Region	Below threshold?	P value	Mean of Ank1F/F;Dlx5/6+	Mean of Ank1+/+;Dlx5/6+	Difference	SE of difference	t ratio	df	Adjusted P Value
			Cortex	WFA+ Pv-	No	0.993167	2.823	2.817	0.006667	0.7317	0.009111	4	0.993167								cKO	113/38d	cortex	cortex	0.00508028	13144	200		Hippocampus	Yes	0.00106	17161	33843	-16682	1967	8.479	4	0.00212
																					cKO	149/35d	cortex	cortex	0.004817	18612.4	200		Cortex	Yes	0.00128	15435	30485	-15050	1865	8.072	4	0.00212
																					cKO	199/34d	cortex	cortex	0.004774	14547.9	200
			Ank1+/+;Dlx5/6-Cre v. Ank1F/F;Dlx5/6-Cre																		control	Mean	cortex	cortex	0.00511745	28099.8	600					CTFC
			Region	Cell type	Below threshold?	P value	Mean of 1mo cKO	Mean of 1mo cre control	Difference	SE of difference	t ratio	df	Adjusted P Value								cre	Mean	cortex	cortex	0.00453517	30484.5	600		hippocampus	F.Test	control v. cre	0.777727
			Hippocampus	WFA+ Pv+	No	0.638961	0.69	0.6467	0.04333	0.08551	0.5068	4	0.638961								cko	Mean	cortex	cortex	0.00489043	15434.8	600		hippocampus	F.Test	control v. cko	0.894089
			Hippocampus	WFA- Pv+	No	0.183375	0.9167	1.093	-0.1767	0.1099	1.607	4	0.455412																hippocampus	F.Test	cre v. cko	0.880833
			Hippocampus	WFA+ Pv-	No	0.293106	1.063	1.26	-0.1967	0.1626	1.209	4	0.500301																cortex	F.Test	control v. cre	0.466695
			Cortex	WFA+ Pv+	No	0.150172	3.12	2.457	0.6633	0.3732	1.777	4	0.386247								Corrected Total Cell Fluorescence (CTCF) =								cortex	F.Test	control v. cko	0.981468
			Cortex	WFA- Pv+	No	0.160009	2.517	2.017	0.5	0.2902	1.723	4	0.386247								raw integrated density - (area * mean fluorescence of background)								cortex	F.Test	cre v. cko	0.453564
			Cortex	WFA+ Pv-	No	0.424051	2.817	3.493	-0.6767	0.7608	0.8894	4	0.424051
	Fig. 3H - 12-month WFA and Pv Cell Numbers
		group	animal	region	area	Pv+	WFA+	Pv+/UA	WFA+/UA	WFA+/Pv+	WFA-/Pv+	WFA+/Pv-	C.Total	Cells/UA	WFA+/Pv+ /UA	WFA-/Pv+ /UA	WFA+/Pv- /UA
		flox	129/36d	hippocampus	35.18	91	85	2.5867	2.41615	43	48	43	134	3.80898	1.22229	1.36441	1.22229
		flox	136/40d	hippocampus	64.065	116	118	1.81066	1.84188	77	39	40	156	2.43503	1.2019	0.608757	0.624366
		flox	170/41d	hippocampus	25.133	66	73	2.62603	2.90455	39	27	34	100	3.97883	1.55174	1.07428	1.3528
		cre	101	hippocampus	31.6592	56	69	2.38925	2.24821	24	32	45	101	3.19022	0.758073	1.01076	1.42139
		cre	102	hippocampus	34.734	70	90	2.49491	3.18853	41	29	49	119	3.42603	1.1804	0.834916	1.41072
		cre	104	hippocampus	39.2267	87	93	3.03706	2.52063	53	34	40	127	3.23759	1.35112	0.866757	1.01971
		cKO	113/38d	hippocampus	48.554	91	80	1.8742	1.64765	44	47	36	127	2.61564	0.906208	0.967994	0.741443
		cKO	149/35d	hippocampus	44.31	75	72	1.69262	1.62492	29	46	43	118	2.66306	0.65448	1.03814	0.970436
		cKO	199/34d	hippocampus	39.415	73	65	1.85209	1.64912	31	42	33	106	2.68933	0.786503	1.06558	0.837245
		flox	mean	hippocampus	41.4593	91	92	2.34113	2.38752	53	38	39	130	3.40761	1.32531	1.01582	1.06648
		cre	mean	hippocampus	35.2066	71	84	2.6404	2.65245	39.3333	31.6667	44.6667	115.667	3.28462	1.09653	0.904146	1.28394
		cko	mean	hippocampus	44.093	79.6667	72.3333	1.8063	1.64056	34.6667	45	37.3333	117	2.65601	0.782397	1.02391	0.849708
		flox	129/36d	cortex	96.193	565	893	5.87361	9.28342	403	286	433	1122	11.6641	4.18949	2.97319	4.50137
		flox	136/40d	cortex	77.419	616	814	7.9567	10.5142	462	154	352	968	12.5034	5.96753	1.98918	4.54669
		flox	170/41d	cortex	80.92	690	738	8.52694	9.12012	480	210	258	948	11.7153	5.93178	2.59516	3.18833
		cre	101	cortex	71.1143	559	700	8.18697	9.68244	379	180	321	880	12.3745	5.32945	2.53114	4.51386
		cre	102	cortex	67.7981	414	733	5.67654	10.5278	313	101	420	834	12.3012	4.61665	1.48972
		cre	104	cortex	70.3685	554	733	7.08636	10.3127	375	179	358	912	12.9603	5.32909	2.54375	5.0875
		cKO	113/38d	cortex	68.934	426	499	6.17982	7.23881	233	193	266	692	10.0386	3.38004	2.79978	3.85876
		cKO	149/35d	cortex	79.828	445	761	5.57449	9.533	327	108	424	859	10.7606	4.09631	1.35291	5.31142
		cKO	199/34d	cortex	91.257	543	599	5.95023	6.56388	307	236	292	835	9.14998	3.36413	2.5861	3.19975
		flox	mean	cortex	84.844	623.667	815	7.45242	9.63925	448.333	216.667	347.667	1012.67	11.9609	5.36294	2.51917	4.0788
		cre	mean	cortex	69.7603	509	722	6.98329	10.1743	355.667	153.333	366.333	875.333	12.5453	5.09173	2.1882	4.80068
		cko	mean	cortex	80.0063	471.333	619.667	5.90151	7.77856	289	179	327.333	795.333	9.98307	3.61349	2.24626	4.12331
			Multiple unpaired t-tests with Holm-Šídák method for multiple comparisons									WFA+/Pv+ /UA	WFA-/Pv+ /UA	WFA+/Pv- /UA
			Test name	Unpaired t test					hippocampus	F.Test	control v. cre	0.585274	0.113941	0.51552
			Variance assumption	Individual variance for each row					hippocampus	F.Test	control v. cko	0.58275	0.034263	0.161207
			Multiple comparisons	Set P value threshold					hippocampus	F.Test	cre v. cko	0.290755	0.44783	0.403133
			Method	Holm-Šídák method					cortex	F.Test	control v. cre	0.281584	0.804769	0.696938
			Alpha	0.05					cortex	F.Test	control v. cko	0.289577	0.575449	0.675419
									cortex	F.Test	cre v. cko	0.983674	0.749955	0.513174
			Ank1F/F v. Ank1+/+;Dlx5/6-Cre
			Region	Cell type	Below threshold?	P value	Mean of 12mo flox	Mean of 12mo cre control	Difference	SE of difference	t ratio	df	Adjusted P Value
			Hippocampus	WFA+ Pv+	No	0.338838	1.323	1.097	0.2267	0.2089	1.085	4	0.710983
			Hippocampus	WFA- Pv+	No	0.65061	1.013	0.9033	0.11	0.2251	0.4887	4	0.710983
			Hippocampus	WFA+ Pv-	No	0.446014	1.063	1.283	-0.22	0.2606	0.8444	4	0.710983
			Cortex	WFA+ Pv+	No	0.689986	5.363	5.092	0.2716	0.633	0.429	4	0.752931
			Cortex	WFA- Pv+	No	0.50294	2.52	2.188	0.3318	0.4512	0.7353	4	0.752931
			Cortex	WFA+ Pv-	No	0.324711	4.08	4.801	-0.7207	0.6133	1.175	3	0.692058
			Ank1F/F v. Ank1F/F;Dlx5/6-Cre
			Region	Cell type	Below threshold?	P value	Mean of 12mo flox	Mean of 12mo cKO	Difference	SE of difference	t ratio	df	Adjusted P Value
			Hippocampus	WFA+ Pv+	Yes	0.016569	1.323	0.7833	0.54	0.1361	3.968	4	0.048889
			Hippocampus	WFA- Pv+	No	0.954653	1.013	1.027	-0.01333	0.2204	0.06051	4	0.954653
			Hippocampus	WFA+ Pv-	No	0.414373	1.063	0.85	0.2133	0.2345	0.9098	4	0.657041
			Cortex	WFA+ Pv+	No	0.051123	5.363	3.613	1.75	0.6353	2.755	4	0.145662
			Cortex	WFA- Pv+	No	0.636374	2.52	2.247	0.2733	0.5351	0.5108	4	0.867776
			Cortex	WFA+ Pv-	No	0.957594	4.08	4.123	-0.04333	0.7659	0.05658	4	0.957594
			Ank1+/+;Dlx5/6-Cre v. Ank1F/F;Dlx5/6-Cre
			Region	Cell type	Below threshold?	P value	Mean of 12mo cKO	Mean of 12mo cre control	Difference	SE of difference	t ratio	df	Adjusted P Value
			Hippocampus	WFA+ Pv+	No	0.175818	0.7833	1.097	-0.3133	0.1908	1.643	4	0.221994
			Hippocampus	WFA- Pv+	No	0.117953	1.027	0.9033	0.1233	0.06209	1.986	4	0.221994
			Hippocampus	WFA+ Pv-	No	0.042541	0.85	1.283	-0.4333	0.1476	2.936	4	0.122272
			Cortex	WFA+ Pv+	Yes	0.012187	3.613	5.092	-1.478	0.3401	4.347	4	0.036116
			Cortex	WFA- Pv+	No	0.923447	2.247	2.188	0.05846	0.5715	0.1023	4	0.923447
			Cortex	WFA+ Pv-	No	0.4754	4.123	4.801	-0.6773	0.8324	0.8137	3	0.724795
[truncated: 10 more columns]
