# Supplementary material for: Ankyrin-R regulates fast-spiking interneuron excitability through perineuronal nets and Kv3.1b K+ channels
Source: eLife. 2021 Jun 28;10:e66491. doi: 10.7554/eLife.66491 (PMC8257253; doi:10.7554/eLife.66491)
Supplement: Figure 5—figure supplement 1—source data 1. [file elife-66491-fig5-figsupp1-data1.xlsx]

## Sheet: Sheet1
	Figure 5 - Supplement 1E
	Max dV/dt
	Ank1F/F	Ank1+/+; Dlx5/6-Cre	Ank1F/F; Dlx5/6-Cre
	220	151.4	235.6
	103.5	267.6	184.9
	149.2	218.8	242.9
	228.3	169.1	162
	270.1	282.3	174.9
	260.9	280.2	122.7
		305.2
	202		206
	347.3	232.2	102.5
	224.3	155	203.2
		298.8	165.7
	142.2	158.4	217.9
	265.5	346.1
	270.1	313.1	224
	422.4	263.4	219.4
	297.5	262.5	220.6
	305.8	213	222.2
	188		157.2
	271.9		116.9
	155.6		226.7
	143.1		223.7
			256.7
			71.72
			175.8
			235.3
			184
			240.8
			138.2
			136.7
			113.2
			189.8
			192
