# Supplementary material for: Ankyrin-R regulates fast-spiking interneuron excitability through perineuronal nets and Kv3.1b K+ channels
Source: eLife. 2021 Jun 28;10:e66491. doi: 10.7554/eLife.66491 (PMC8257253; doi:10.7554/eLife.66491)
Supplement: Figure 5—figure supplement 2—source data 1. [file elife-66491-fig5-figsupp2-data1.xlsx]

## Sheet: Sheet1
	Figure 5- supplement 2B				Figure 5- supplement 2C				Figure 5- supplement 2D				Figure 5- supplement 2E				Figure 5- supplement 2F
	mEPSC frequency (Hz)				mEPSC amplitude (pA)				mIPSC frequency (Hz)				mIPSC amplitude (pA)				E/I Ratio
	Ank1f/f	Ank1+/+; Dlx5/6-cre+	Ank1f/f; Dlx5/6-cre+		Ank1f/f	Ank1+/+; Dlx5/6-cre+	Ank1f/f; Dlx5/6-cre+		Ank1f/f	Ank1+/+; Dlx5/6-cre+	Ank1f/f; Dlx5/6-cre+		Ank1f/f	Ank1+/+; Dlx5/6-cre+	Ank1f/f; Dlx5/6-cre+		Ank1f/f	Ank1+/+; Dlx5/6-cre+	Ank1f/f; Dlx5/6-cre+
	21.3158	32.307	12.6211		13.8244	16.2202	10.7661		5.63684	12.5263	16.4772		21.8463	24.4949	28.2999		0.733076	0.49969	0.078252
	20.2316	19.7807	17.5679		12.6036	19.0574	12.7374		6.15789	13.2072	10.1754		23.322	21.8902	23.5374		0.486329	0.359133	0.298468
	18.0263	24.3077	7.64912		21.6647	20.6116	12.5431		9.83158	10.883			26.5397	35.1885			0.375497	0.336819	0.641308*
	2.97368	19.3279			16.8945	17.4267			9.81754	8.07602	9.3073		21.9966	36.7222	34.527		0.079344	0.237269
		17.0579	18.0772			17.2616	16.3074			18.6374	13.7351			26.6901	26.4578			0.19333	0.225995
	23.4386		25.3123		16.0426		16.542		13.8	11.0807	11.8702		20.1523	36.8577	33.9836		0.342401		0.334079
	28.5474	29.2982	22.1719		15.9722	13.3131	14.6266		10.6175	12.1404	12.9526		20.2074	19.225	21.7118		0.507654	0.565217	0.222542
	22.1215		29.4812		15.9277		16.2976		18.996	13.0936	20.3158		21.9319	27.335	30.3394		0.216632		0.408075
	11.4667	27.1491	12.0789		15.3686	15.51	15.7621		28.8016	12.8912			22.1837	21.7665			0.076666	0.445066	0.092067
	22.8947				17.4531				9.65325		17.0031		18.6177		30.8265		0.528756
	38.2297				18.1457				16.5	19.5	14.3839		24.0386	36.3753	33.4886		0.421272
			8.98246				12.2918			10.8912	10.3368			24.1897	35.2871				0.063173
		14.3626	16.4311			12.7609	16.1632		5.87719	8.69474	8.52632		30.4593	34.1317	15.0917			0.079503	0.196859
		9.66316	18.1895			22.3566	12.5457		8.47847	16.8421	12.8618		26.6653	28.597	21.4853			0.194296	0.577088
	21.8129	12.2877			11.4332	21.8927			7.03349	14.0772	10.5544		26.481	25	30.746		0.290877	0.178915
			20.814				15.3958		15.9263	10.4702	8.62105		12.091	29.9056	35.0786				0.293401
	22.7602	14.5066	16.4593		14.3032	14.3741	17.7723		7.62456	13.8807	17.5789		19.1009	39.0004	24.9342		0.450398	0.193042	0.246547
	26.4912	26.4298	32.4526		16.864	19.7952	19.1667		9.86757	10.1140351*			18.2723	8.88025*			0.860182	0.43189	0.451922
	20.9614	20.4211			19.3369	20.0568			6.14211	12.886	14.8995		26.1337	32.3235	20.6459		0.539305	0.172152
	13.3333				20.0683				17.8333	18.1579	28.2481		32.3163	28.5201	21.3735		0.437667
		20.2024	18.8702			16.1955	12.2631		10.3333		11.1871		32.4023		21.4846			0.209202	0.202782
	26.1053	26.5123	4.37719		15.1297	13.1139	16.3811				13.6842				32.8276		0.292826	0.182509	0.043607
			14.3772				20.1299				9.02456				34.2554				0.308164
			14.5351				16.2837				5.50292				15.1654				0.171298
			22.2947				19.1014				6.34903				25.8489				0.355823
			10.5351				12.2386				10.6908				28.0663				0.474444
			14.7368				14.3086												0.35188
			14.5182				16.9535												0.205083
