# Supplementary material for: Ankyrin-R regulates fast-spiking interneuron excitability through perineuronal nets and Kv3.1b K+ channels
Source: eLife. 2021 Jun 28;10:e66491. doi: 10.7554/eLife.66491 (PMC8257253; doi:10.7554/eLife.66491)
Supplement: Figure 6—figure supplement 1—source data 1. [file elife-66491-fig6-figsupp1-data1.xlsx]

## Sheet: Sheet1
											Figure 6 - supplement 1F - Kv3.1 Threshold Staining Intensity in 1-month Somatosensory Cortex													Figure 6 - supplement 1G - Kv3.2 Threshold Staining Intensity in 1-month Somatosensory Cortex														Figure 6 - supplement 1 Full Length Blots
Figure 6 - supplement 1C - Kv3.1b Expression in AnkR cKO by IB												1mo AnkR and Kv3.1 staining in SS cortex 20X						Threshold at 80, 100		Table Analyzed	Mean Kv3.1				1mo AnkR and Kv3.2 staining in SS cortex 20X						Threshold at 111, 255		Table Analyzed	Mean Kv3.2
	Kv3.1b Expression in AnkR cKO by IB												Kv3.1							Column B	Ank1F/F;Dlx5/6+					Kv3.2							Column B	Ank1F/F;Dlx5/6+
														Mean	IntDen		Mean	IntDen		vs.	vs.						Mean	IntDen		Mean	IntDen		vs.	vs.
	Timepoint: 12-months												Flox1_1	9.447	50149065	dcKO1_1	3.899	2.13794e+06		Column A	Ank1F/F					Flox1_1	2.322	1.27328e+06	dcKO1_1	3.294	1.80645e+06		Column A	Ank1F/F
	Animal	1	2	3	1	2	3						Flox1_2	13.603	7.45915e+06	dcKO1_2	4.216	2.31149e+06								Flox1_2	7.528	39960285	dcKO1_2	4.584	2.51352e+06
	Genotype	ncKO	ncKO	ncKO	flox/flox	flox/flox	flox/flox						Flox1_Mean	11.525	2.88041e+07	dcKO1_Mean	4.0575	2.22472e+06		Unpaired t test						Flox1_3	7.42	39387300					Unpaired t test
	Kv3.1b	9265.12	8893.48	11763.5	15502.9	22324.5	23936.9													P value	0.012749					Flox1_Mean	5.75667	2.68736e+07	dcKO1_Mean	3.294	1.80645e+06		P value	0.001494
	NFM	12884.5	12770.1	14089.9	15740.6	17509.6	14160.6						Flox2_1	7.262	3.98192e+06	dcKO2_1	7.079	3.88178e+06		P value summary	*												P value summary	**
	Kv3.1b norm NFM	0.719091	0.696431	0.834887	0.984895	1.27499	1.69039						Flox2_2	12.197	64746795	dcKO2_2	5.617	1.20953e+06		Significantly different (P < 0.05)?	Yes					Flox2_1	4.818	25575990	dcKO2_1	2.118	1.16109e+06		Significantly different (P < 0.05)?	Yes
	Norm to flox Avg	0.546107	0.528899	0.634048	0.74797	0.968277	1.28375						Flox2_Mean	9.7295	3.43644e+07	dcKO2_Mean	6.348	2.54566e+06		One- or two-tailed P value?	Two-tailed					Flox2_2	5.651	29996670	dcKO2_2	3.465	1.89977e+06		One- or two-tailed P value?	Two-tailed
																				t, df	t=4.28971, df=4					Flox2_3	4.429	23510235	dcKO2_3	3.291	1.80455e+06		t, df	t=7.74883, df=4
													Flox3_1	19.808	105151290	dcKO3_1	3.132	1.71753e+06								Flox2_Mean	4.966	26360965	dcKO2_Mean	2.7915	1.53043e+06
													Flox3_2	9.447	50149065	dcKO3_2	2.684	1.47159e+06		How big is the difference?													How big is the difference?
	Table Analyzed	12-months											Flox3_Mean	14.6275	7.76502e+07	dcKO3_Mean	2.908	1.59456e+06		Mean of column A	1					Flox3_1	4.438	2.4334e+06	dcKO3_1	3.911	2.14431e+06		Mean of column A	1
																				Mean of column B	0.371					Flox3_2	4.502	2.46866e+06	dcKO3_2	1.797	985564		Mean of column B	0.585891
	Column B	Ank1F/F; Nestin+											Flox Mean	11.9607	4.69395e+07	dcKO Mean	4.43783	2.12164e+06		Difference between means (B - A) ± SEM	-0.629000 ± 0.146630					Flox3_3	6.642	35256555					Difference between means (B - A) ± SEM	-0.414109 ± 0.0534414
	vs.	vs.																		95% confidence interval	-1.03611 to -0.221890					Flox3_Mean	5.3157	2.30088e+07	dcKO3_Mean	3.911	2.14431e+06		95% confidence interval	-0.562486 to -0.265731
	Column A	Ank1F/F																		R squared (eta squared)	0.821441												R squared (eta squared)	0.937543
													Flox1 Norm	0.963575	0.613643	dcKO1 Norm	0.339237	0.0473953								Flox Mean	5.34612	2.54145e+07	dcKO Mean	3.33217	1.82707e+06
	Unpaired t test												Flox2 Norm	0.813458	0.732098	dcKO2 Norm	0.53074	0.0542326		F test to compare variances													F test to compare variances
	P value	0.053657											Flox3 Norm	1.22297	1.65426	dcKO3 Norm	0.24313	0.0339705		F, DFn, Dfd	1.99949, 2, 2												F, DFn, Dfd	1.79546, 2, 2
	P value summary	ns																		P value	0.66678					Flox1 Norm	1.07679	1.05741	dcKO1 Norm	0.616148	0.0710796		P value	0.715446
	Significantly different (P < 0.05)?	No																		P value summary	ns					Flox2 Norm	0.928898	1.03724	dcKO2 Norm	0.522154	0.060219		P value summary	ns
	One- or two-tailed P value?	Two-tailed											Flox1 Norm	0.963575	0.613643	dcKO1 Norm	0.339237	0.0473953		Significantly different (P < 0.05)?	No					Flox3 Norm	0.994309	0.905343	dcKO3 Norm	0.731558	0.0843737		Significantly different (P < 0.05)?	No
	t, df	t=2.708, df=4											Flox2 Norm	0.813458	0.732098	dcKO2 Norm	0.53074	0.0542326
													Flox3 Norm	1.22297	1.65426	dcKO3 Norm	0.24313	0.0339705		Data analyzed													Data analyzed
	How big is the difference?												Flox Norm Mean	1		dcKO Norm Mean	0.371036			Sample size, column A	3					Flox1 Norm	1.07679	1.05741	dcKO1 Norm	0.616148	0.0710796		Sample size, column A	3
	Mean of column A	1																		Sample size, column B	3					Flox2 Norm	0.928898	1.03724	dcKO2 Norm	0.522154	0.060219		Sample size, column B	3
	Mean of column B	0.5697																								Flox3 Norm	0.994309	0.905343	dcKO3 Norm	0.619674	0.0785112
	Difference between means (B - A) ± SEM	-0.4303 ± 0.1589																								Flox Norm Mean	1		dcKO Norm Mean	0.585992
	95% confidence interval	-0.8716 to 0.01090
	R squared (eta squared)	0.647											Threshold Examples:
	F test to compare variances
	F, DFn, Dfd	22.85, 2, 2
	P value	0.083843
	P value summary	ns
	Significantly different (P < 0.05)?	No
	Data analyzed
	Sample size, column A	3
	Sample size, column B	3
